# Supplementary material for: Internal Transcribed Spacer and 16S Amplicon Sequencing Identifies Microbial Species Associated with Asbestos in New Zealand
Source: MDPI journal article supplement (doi:10.3390/genes14030729), 2023-03-16
Supplement: s1 [file s1]

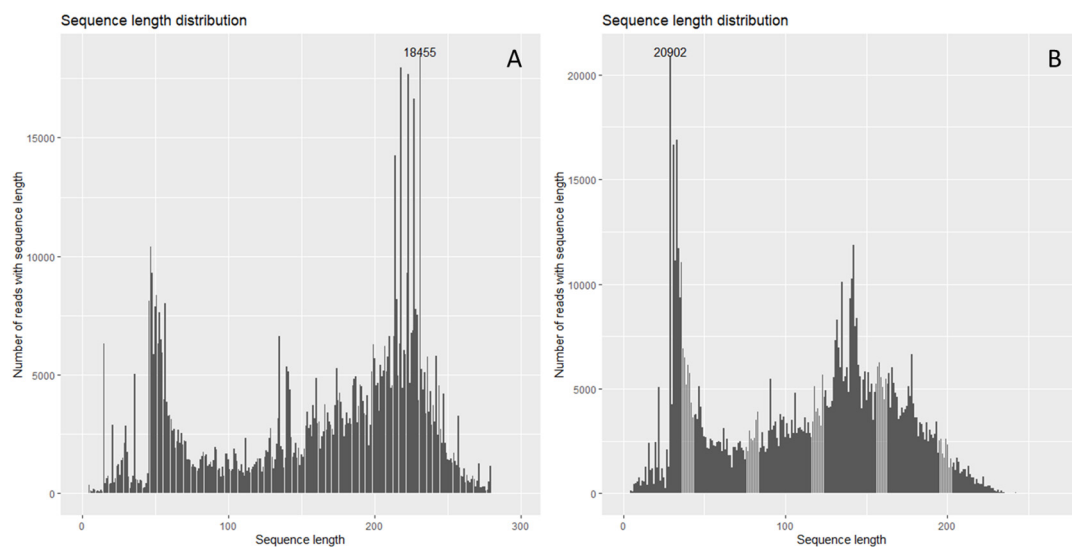

Figure S1: Frequency histogram of forward (A) and reverse (B) read lengths produced from paired-end Illumina MiSeq amplicon sequencing of ITS. Note, reads lengths are subsequent to primer removal and initial trimming for quality.

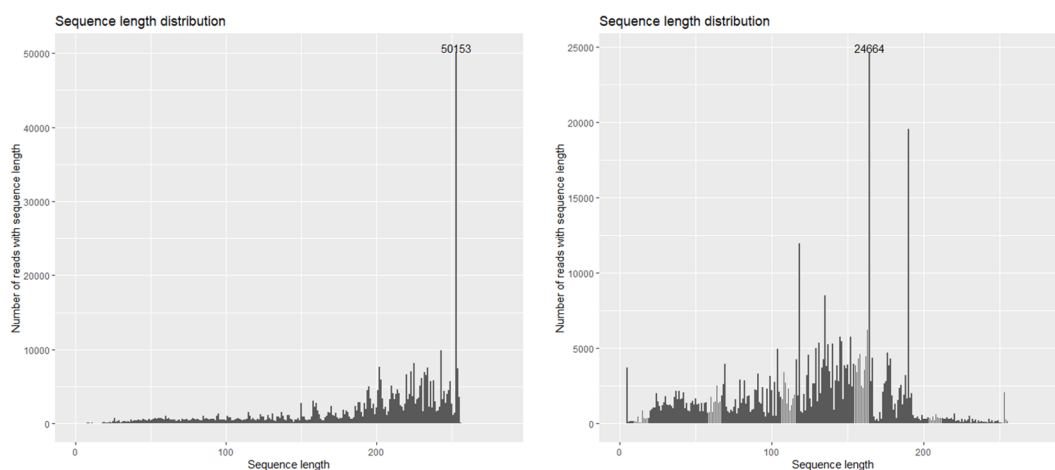

Figure S2: Frequency histogram of forward (A) and reverse (B) read lengths produced from paired-end Illumina MiSeq amplicon sequencing of 16S. Note, reads lengths are subsequent to primer removal and initial trimming for quality.

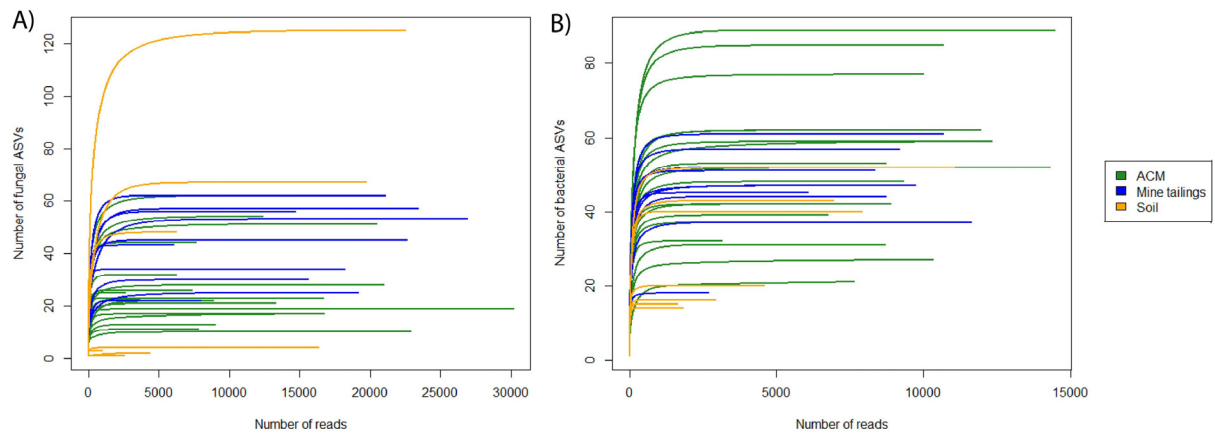

Figure S3: Rarefied species accumulation curves by read count in the A) ITS dataset, and B) 16S dataset. ACM (green), asbestos contaminated material; Mine tailings (blue), raw asbestos samples from mine tailings; Soil (orange), asbestos contaminated soil samples.

Table S1: Abundances of the most abundance 60 ITS ASVs, with identifications determined based on high percentage sequence matches with reference sequences on NCBI.

| ITS ASVs                            | ACM   | Mine  | Soil |
|-------------------------------------|-------|-------|------|
| <i>Alternaria alternata</i>         | 61    | 2591  | 110  |
| <i>Biscogniauxia</i> sp.            | 0     | 632   | 0    |
| <i>Bullera alba</i>                 | 0     | 489   | 0    |
| <i>Caloplaca austroclitina</i>      | 15208 | 0     | 0    |
| Capnodiales sp.                     | 648   | 0     | 0    |
| <i>Cladosporium cladosporioides</i> | 4753  | 13687 | 2232 |
| <i>Cladosporium</i> sp.             | 0     | 501   | 0    |
| <i>Cladosporium sphaerospermum</i>  | 1558  | 0     | 677  |
| <i>Coniosporum</i> sp.              | 5465  | 0     | 33   |
| <i>Cyphellophora</i> sp.            | 2280  | 0     | 0    |
| <i>Devriesia</i> sp.                | 6104  | 0     | 0    |
| Didymellaceae                       | 7588  | 0     | 0    |
| <i>Elaphocordyceps</i> sp.          | 5770  | 0     | 0    |
| <i>Epicoccum nigrum</i> 1           | 455   | 9618  | 656  |
| <i>Epicoccum nigrum</i> 2           | 0     | 8227  | 0    |
| <i>Fomitopsis hemitephra</i>        | 0     | 3505  | 0    |
| Fungi 1                             | 0     | 14116 | 0    |
| Fungi 2                             | 0     | 1501  | 0    |
| Fungi 3                             | 0     | 1429  | 0    |
| Fungi 4                             | 935   | 0     | 0    |
| Fungi 5                             | 0     | 7111  | 0    |
| Fungi 6                             | 18144 | 0     | 0    |
| Fungi 7                             | 0     | 5744  | 0    |
| Fungi 8                             | 0     | 5561  | 0    |
| Fungi 9                             | 0     | 2340  | 0    |
| Fungi 10                            | 4614  | 0     | 0    |

|                                   |      |      |      |
|-----------------------------------|------|------|------|
| Fungi 11                          | 0    | 2937 | 0    |
| Fungi 12                          | 2141 | 0    | 0    |
| <i>Fusarium acuminatum</i>        | 0    | 2718 | 154  |
| <i>Fusarium gramineum</i>         | 543  | 0    | 0    |
| <i>Fusarium oxysporum</i>         | 120  | 183  | 3262 |
| <i>Fusarium</i> sp.               | 8528 | 0    | 0    |
| <i>Ganoderma australe</i>         | 0    | 698  | 0    |
| Helotiales sp.                    | 2087 | 0    | 306  |
| Hymenochaetales sp. 1             | 0    | 600  | 0    |
| Hymenochaetales sp. 2             | 0    | 403  | 0    |
| <i>Lecidea</i> sp.                | 0    | 2810 | 0    |
| Leprocaulaceae                    | 5738 | 0    | 0    |
| <i>Meyerozyma guilliermondii</i>  | 0    | 558  | 0    |
| <i>Neodevriesia</i> sp. 2         | 1311 | 0    | 132  |
| <i>Neodevriesia</i> sp. 1         | 1875 | 0    | 0    |
| <i>Neodevriesia</i> sp. 3         | 1336 | 0    | 0    |
| <i>Paraphoma</i> sp.              | 415  | 0    | 0    |
| <i>Physcia</i> sp.                | 9233 | 0    | 0    |
| <i>Plectosphaerella</i> sp.       | 157  | 0    | 454  |
| <i>Preussia minima</i>            | 112  | 397  | 0    |
| <i>Protoblastenia rupestris</i>   | 9702 | 0    | 0    |
| <i>Pseudopithomyces chartarum</i> | 901  | 808  | 451  |
| <i>Salinomyces thailandica</i>    | 725  | 0    | 0    |
| <i>Sporobolomyces ruberrimus</i>  | 0    | 3120 | 0    |
| Stereaceae                        | 0    | 1465 | 0    |
| <i>Trichosporon asahii</i>        | 0    | 783  | 3808 |
| <i>Verrucaria</i> sp. 1           | 6743 | 0    | 0    |
| <i>Verrucaria</i> sp. 2           | 1709 | 0    | 0    |
| Verrucariaceae                    | 1342 | 0    | 0    |
| <i>Vishniacozyma carnescens</i>   | 145  | 0    | 1424 |
| <i>Vishniacozyma</i> sp.          | 12   | 332  | 66   |
| <i>Wallemia muriae</i>            | 399  | 0    | 510  |
| <i>Yarrowia lipolytica</i> 1      | 0    | 1391 | 2314 |
| <i>Yarrowia lipolytica</i> 2      | 0    | 806  | 365  |

Table S2: Abundances of the most abundance 60 16S ASVs, with identifications determined based on high percentage sequence matches with reference sequences on NCBI.

| 16S ASVs                   | ACM  | Mine | Soil |
|----------------------------|------|------|------|
| <i>Acinetobacter</i> sp. 1 | 0    | 38   | 5008 |
| <i>Acinetobacter</i> sp. 2 | 0    | 127  | 556  |
| <i>Acinetobacter</i> sp. 3 | 0    | 56   | 1074 |
| <i>Actinomyces</i> sp.     | 2537 | 0    | 0    |
| Archaea                    | 1550 | 0    | 0    |
| Bacteria 1                 | 5759 | 607  | 0    |
| Bacteria 2                 | 1618 | 1174 | 0    |

|                                |      |      |     |
|--------------------------------|------|------|-----|
| Bacteria 3                     | 2151 | 1478 | 0   |
| Bacteria 4                     | 2215 | 371  | 0   |
| Bacteria 5                     | 0    | 1703 | 0   |
| Bacteria 6                     | 0    | 1505 | 0   |
| Bacteria 7                     | 632  | 200  | 0   |
| Bacteria 8                     | 0    | 3887 | 0   |
| Bacteria 9                     | 0    | 1501 | 0   |
| Bacteria 10                    | 0    | 498  | 0   |
| Bacteria 11                    | 0    | 316  | 0   |
| Bacteria 12                    | 0    | 1172 | 0   |
| Bacteria 13                    | 0    | 1077 | 0   |
| Bacteria 14                    | 0    | 805  | 0   |
| Bacteria 15                    | 168  | 591  | 0   |
| Bacteria 16                    | 657  | 0    | 0   |
| Bacteria 17                    | 913  | 0    | 0   |
| Bacteria 18                    | 0    | 747  | 0   |
| Bacteria 19                    | 0    | 509  | 0   |
| Bacteria 20                    | 96   | 77   | 0   |
| Bacteria 21                    | 229  | 0    | 0   |
| Bacteria 22                    | 0    | 1630 | 0   |
| Bacteria 23                    | 1609 | 0    | 0   |
| Bacteria 24                    | 0    | 890  | 0   |
| Bacteria 25                    | 0    | 1301 | 0   |
| Bacteria 26                    | 788  | 0    | 0   |
| Bacteria 27                    | 905  | 0    | 0   |
| Bacteria 28                    | 0    | 939  | 0   |
| <i>Bradomyces</i> sp.          | 341  | 110  | 0   |
| <i>Caloplaca</i> sp.           | 3588 | 0    | 0   |
| <i>Chroococcidiopsis</i> sp. 1 | 0    | 2781 | 0   |
| <i>Chroococcidiopsis</i> sp. 2 | 0    | 4136 | 0   |
| <i>Chroococcidiopsis</i> sp. 3 | 0    | 3449 | 0   |
| <i>Chroococcidiopsis</i> sp. 4 | 0    | 2020 | 0   |
| <i>Chroococcidiopsis</i> sp. 5 | 0    | 1513 | 0   |
| <i>Chroococcidiopsis</i> sp. 6 | 748  | 0    | 0   |
| Cyanobacterium                 | 4026 | 0    | 0   |
| <i>Dermatocarpon</i> sp.       | 769  | 0    | 14  |
| <i>Dothideomycetes</i> sp.     | 694  | 0    | 0   |
| <i>Fibrella</i> sp.            | 1128 | 0    | 0   |
| Fungi                          | 0    | 352  | 0   |
| <i>Hymenobacter</i> sp.        | 635  | 0    | 0   |
| Prokaryote                     | 1220 | 64   | 169 |
| <i>Pseudonocardia</i> sp.      | 914  | 0    | 0   |
| <i>Ralstonia</i> sp.           | 114  | 0    | 596 |
| <i>Rubrobacter</i> sp.         | 5956 | 1660 | 0   |
| <i>Sphingomonas</i> sp. 1      | 705  | 0    | 942 |
| <i>Sphingomonas</i> sp. 2      | 705  | 0    | 0   |
| <i>Sphingomonas</i> sp. 3      | 2784 | 0    | 0   |

|                         |      |      |   |
|-------------------------|------|------|---|
| <i>Spirosoma</i> sp. 1  | 0    | 1315 | 0 |
| <i>Spirosoma</i> sp. 2  | 0    | 775  | 0 |
| <i>Stigonema</i> sp.    | 0    | 2839 | 0 |
| <i>Verrucaria</i> sp. 1 | 1346 | 0    | 0 |
| <i>Verrucaria</i> sp. 2 | 3574 | 0    | 0 |
| <i>Verrucaria</i> sp. 3 | 414  | 0    | 0 |
